# Supplementary material for: Prediction of clusters of miRNA binding sites in mRNA candidate genes of breast cancer subtypes
Source: PeerJ. 2019 Nov 13;7:e8049. doi: 10.7717/peerj.8049 (PMC6858813; doi:10.7717/peerj.8049)
Supplement: Figure S1 [file peerj-07-8049-s001.pdf]

|                                                                                                                                                                                                                                        |                                                                                                                                                                                                        |
|----------------------------------------------------------------------------------------------------------------------------------------------------------------------------------------------------------------------------------------|--------------------------------------------------------------------------------------------------------------------------------------------------------------------------------------------------------|
| <i>CBL</i> ; ID01810.3p-miR; 5'UTR; 31; -113; 87; 23<br>5' -GGC <b>GGCGGCGGCGGC</b> CGGGA-3'<br>                                   <br>3' -CCG <b>U</b> CGCC <b>ACCAU</b> CG <b>U</b> CG <b>ACCAU</b> -5'                              | <i>RAB5A</i> ; ID03229.5p-miR; 5'UTR; 327; -115; 86; 22<br>5' -GGC <b>AC</b> CGCCGCCCGCC <b>ACCA</b> -3'<br>                                   <br>3' -CU <b>ACCAC</b> GGCGGGCGGGCGGC-5'               |
| <i>RUNXI</i> ; ID01321.5p-miR; 5'UTR; 1436; -110; 90; 21<br>5' -CCCCCCCC <b>CCCCCA</b> CCCCCG-3'<br>                                   <br>3' -GGGCGGG <b>AAGGAGA</b> AGGGGGC-5'                                                       | <i>CBL</i> ; miR-3198; CDS; 1589; -106; 88; 22<br>5' -UCUCCAUUC <b>U</b> CCAUG <b>G</b> CCCCAC-3'<br>                                   <br>3' -AGAGGUAAG <b>G</b> GGUCC <b>U</b> GAGGUG-5'            |
| <i>ATM</i> ; miR-5095; 3'UTR; 9787; -108; 93; 21<br>5' -CGC <b>AGCGG</b> CUCACGCCUGAA-3'<br>                                   <br>3' -GCG <b>CA</b> CC <b>A</b> AGUGCGGACAUU-5'                                                       | <i>ATM</i> ; miR-619-5p; 3'UTR; 9793; -119; 98; 22<br>5' -GCCUGGCC <b>AGU</b> AUGGUGAAAC-3'<br>                                   <br>3' -CGGAC <b>U</b> GGU <b>U</b> GUACCACUUUG-5'                   |
| <i>ATM</i> ; miR-5096; 3'UTR; 9882; -104; 92; 21<br>5' -GCCUGGCC <b>AGU</b> AUGGUGAAAC-3'<br>                                   <br>3' -CGGAC <b>U</b> GGU <b>U</b> GUACCACUUUG-5'                                                     | <i>ATM</i> ; miR-1273a; 3'UTR; 11054; -119; 90; 25<br>5' -GAGACAGAGUCUUGCU <b>C</b> UGUC <b>ACCC</b> -3'<br>                                   <br>3' -UUCUUUCUCAGAACGA <b>AA</b> CAG <b>C</b> GGG-5'  |
| <i>ATM</i> ; miR-1273g-3p; 3'UTR; 11076; -113; 96; 21<br>5' -CCAGGCUGGAGUGCAGUG <b>G</b> C-3'<br>                                   <br>3' -G <b>A</b> GUCCGACCUCACGUCAC <b>CA</b> -5'                                                 | <i>ATM</i> ; miR-1273e; 3'UTR; 11119; -108; 93; 22<br>5' -UC <b>UGCC</b> UCCUGGGUUCAAGCAA-3'<br>                                   <br>3' -AG <b>GUGA</b> AGGACCCAAGUUCGUU-5'                          |
| <i>CBL</i> ; miR-1273a; 3'UTR; 7727; -117; 89; 25<br>5' -GAGAU <b>G</b> GAGUCU <b>C</b> GCUGUGUCGCC-3'<br>                                   <br>3' -UUCUU <b>U</b> CUCAGAA <b>AC</b> GAAACAGCGGG-5'                                   | <i>CBL</i> ; miR-566; 3'UTR; 7838; -98; 90; 19<br>5' -GCUGGGAU <b>U</b> ACAGGCGCC <b>U</b> -3'<br>                                   <br>3' -CA <b>ACCCU</b> AGUGUCCGCGGG-5'                           |
| <i>CBL</i> ; miR-3155a; 3'UTR; 10588; -106; 91; 21<br>5' -AGUGCCCUCUGCAG <b>G</b> CCUGG-3'<br>                                   <br>3' -UCAAGGGUGACGUC <b>U</b> CGGACC-5'                                                             | <i>IL11</i> ; miR-1273f; 3'UTR; 1466; -102; 98; 19<br>5' -CACUGCAACCUC <b>CA</b> CCUCC-3'<br>                                   <br>3' -GUGACGUUGGAGGU <b>A</b> GAGG-5'                                |
| <i>IL11</i> ; miR-1273d; 3'UTR; 1467; -121; 89; 25<br>5' -ACUGCA <b>ACC</b> UCCACCUC <b>C</b> GGGUUC-3'<br>                                   <br>3' -UGACGU <b>C</b> GGAGUUGGAGU <b>AC</b> CCAAG-5'                                   | <i>IL11</i> ; miR-1273e; 3'UTR; 1476; -113; 96; 22<br>5' -UCCACC <b>U</b> CCCGGGUUCAAGCAA-3'<br>                                   <br>3' -AGGUG <b>A</b> AGG <b>AC</b> CCAAGUUCGUU-5'                 |
| <i>IL11</i> ; ID01404.5p-miR; 3'UTR; 1476; -113; 91; 23<br>5' -GCA <b>ACC</b> UC <b>C</b> ACCUC <b>C</b> GGGUUCA-3'<br>                                   <br>3' -CGUU <b>AGAG</b> AAGGAG <b>AG</b> CCCCAAGU-5'                        | <i>IL11</i> ; miR-5095; 3'UTR; 1982; -106; 91; 21<br>5' -CA <b>U</b> GGUGGCUCACGCCUGUAA-3'<br>                                   <br>3' -G <b>CG</b> CCACC <b>A</b> AGUGCGGACAUU-5'                    |
| <i>RUNXI</i> ; ID00436.3p-miR; 3'UTR; 5464; -108; 93; 23<br>5' -GUGUGUGCGU <b>GUGUGUGUGUGUG</b> -3'<br>                                   <br>3' -CACACACGCA <b>UAUAU</b> ACACACA <b>U</b> -5'                                         | <i>STMN1</i> ; miR-1273a; 1729; 3'UTR; -115; 87; 25<br>5' -G <b>AGG</b> CAGAGUCU <b>CAC</b> UCUGUCGCC-3'<br>                                   <br>3' -UUC <b>U</b> UUCUCAGAA <b>AC</b> GAAACAGCGGG-5' |
| <i>STMN1</i> ; miR-1273c; 1731; 3'UTR; -106; 88; 22<br>5' -G <b>G</b> CAG <b>A</b> GUUCU <b>CAC</b> UCUGUCGCC-3'<br>                                   <br>3' -C <b>U</b> GUCCAGAG <b>CAAA</b> ACAGCGG-5'                              | <i>STMN1</i> ; miR-1273-3p; 1751; 3'UTR; -103; 93; 21<br>5' -CC <b>C</b> AGGCUGGAGGGCAGUG <b>G</b> C-3'<br>                                   <br>3' -G <b>AG</b> UCCGACCUCACGUCAC <b>CA</b> -5'       |
| <i>STMN1</i> ; miR-1285-3p; 1735; 3'UTR; -104; 89; 22<br>5' -G <b>A</b> GUUCACU <b>C</b> UGU <b>C</b> GCCCAG <b>G</b> -3'<br>                                   <br>3' -U <b>CC</b> CAGAGUGA <b>AA</b> CA <b>AC</b> GGGUC <b>U</b> -5' | <i>STMN1</i> ; miR-5585-3p; 1831; 3'UTR; -106; 91; 22<br>5' -CU <b>CC</b> CGAGUAGCUGGGACUACA-3'<br>                                   <br>3' -GAG <b>AG</b> CUCAUCGACCAUGAAGU-5'                       |
| <i>SFN</i> ; ID00436.3p-miR; 3'UTR; 1190; -104; 89; 23<br>5' -GUGUGUG <b>UGUGUGUGUGUGUGUG</b> -3'<br>                                   <br>3' -CACACAC <b>GCAUAUAU</b> ACACACA <b>U</b> -5'                                           | <i>SFN</i> ; ID00436.3p-miR; 3'UTR; 1202; -104; 89; 23<br>5' -GUGUGUG <b>UGUGUGUGUGUGUGUGUG</b> -3'<br>                                   <br>3' -CACACAC <b>GCAUAUAU</b> ACACACA <b>U</b> -5'         |
| <i>SFN</i> ; ID01727.5p-miR; 3'UTR; 1203; -106; 91; 23<br>5' -UGUGUGUGUGUGUGUG <b>UGUGUG</b> C-3'<br>                                   <br>3' -ACACACAAACAAACA <b>U</b> ACACAC <b>G</b> -5'                                           | <i>SFN</i> ; ID02868.3p-miR; 3'UTR; 1188; -113; 90; 23<br>5' -G <b>G</b> GUGUGUGUGUGUGUGUGUG <b>UG</b> -3'<br>                                   <br>3' -U <b>CC</b> CACAGACACACACACAC <b>GC</b> -5'   |

Note: Gene; miRNA; the miRNA region; start of binding site (nt); the free energy,  $\Delta G$  (kJ/mole); the  $\Delta G/\Delta G_m$  (%); length of miRNA (nt). The upper and lower nucleotide sequences of mRNA and miRNA, respectively. The nucleotides of non-canonical pairs G-U and A-C highlighted in bold type.

**Supplemental Figure S1** Schemes of miRNA interaction with mRNA of candidate genes of breast cancer triple-negative subtype.
