# Supplementary material for: Prediction of clusters of miRNA binding sites in mRNA candidate genes of breast cancer subtypes
Source: PeerJ. 2019 Nov 13;7:e8049. doi: 10.7717/peerj.8049 (PMC6858813; doi:10.7717/peerj.8049)
Supplement: Figure S2 [file peerj-07-8049-s002.pdf]

|                                                                                                                                                                                                                                                      |                                                                                                                                                                                                                                                      |
|------------------------------------------------------------------------------------------------------------------------------------------------------------------------------------------------------------------------------------------------------|------------------------------------------------------------------------------------------------------------------------------------------------------------------------------------------------------------------------------------------------------|
| <p><i>FOXA1</i>; ID03367.5p-miR; 5'UTR; 122; -117; 93; 20<br/> 5' -CCGCGCCGCCGCCGCC<b>G</b>CCG-3'<br/>                                            <br/> 3' -CGCGCGGCGGCGGCGG<b>U</b>GGC-5'</p>                                                       | <p><i>HMGA2</i>; ID01403.5p-miR; 5'UTR; 547; -119; 87; 23<br/> 5' -<b>C</b>ACCCACCGCC<b>G</b>CGCGCC<b>C</b>ACC-3'<br/>                                            <br/> 3' -G<b>C</b>G<b>A</b>GUGGCG<b>A</b>CG<b>A</b>CGGCGG<b>C</b>G<b>A</b>-5'</p> |
| <p><i>HMGA2</i>; ID01641.3p-miR; 5'UTR; 545; -132; 89; 24<br/> 5' -CCCACCCACCGCCGCCGCCGCCAC-3'<br/>                                            <br/> 3' -GGGGUGGGGGCGGCGGCGGCGGUG-5'</p>                                                             | <p><i>HMGA2</i>; ID02428.3p-miR; 5'UTR; 315; -108; 88; 22<br/> 5' -GGUGGGGGG<b>A</b>AGAGGAGGAGGA-3'<br/>                                            <br/> 3' -CCACCCCC<b>C</b>U<b>U</b>C<b>U</b>C<b>U</b>C<b>U</b>C<b>U</b>CCU-5'</p>                |
| <p><i>HMGA2</i>; ID03324.3p-miR; 5'UTR; 312; -110; 87; 22<br/> 5' -CAGGGUGGG<b>G</b>GG<b>A</b>AGAGGAGGA-3'<br/>                                            <br/> 3' -CUCCACCC<b>U</b>CC<b>U</b>CC<b>U</b>CC<b>U</b>CC-5'</p>                         | <p><i>SMAD3</i>; miR-4508; 5'UTR; 111; -100; 94; 17<br/> 5' -CGCGCGCCGAGCCCCGC-3'<br/>                                            <br/> 3' -GCGCGCGGGUCGGGGCG-5'</p>                                                                                 |
| <p><i>FOXA1</i>; ID02542.5p-miR; CDS; 1129; -125; 87; 24<br/> 5' -GG<b>G</b>CCGGCGGCGG<b>G</b>GGCG<b>G</b>AGC-3'<br/>                                            <br/> 3' -CC<b>U</b>CGGCCGCCGCC<b>U</b>CGGC<b>U</b>CC<b>A</b>-5'</p>                | <p><i>FOXA1</i>; ID03332.3p-miR; CDS; 1150; -134; 90; 24<br/> 5' -<b>A</b>GCGGA<b>A</b>GCGG<b>G</b>GGC<b>A</b>GCGGCGCC-3'<br/>                                            <br/> 3' -CCGCC<b>U</b>CCGCC<b>U</b>CCG<b>C</b>CGCCGCGG-5'</p>             |
| <p><i>HMGA2</i>; ID00101.3p-miR; 3'UTR; 1263; -110; 88; 22<br/> 5' -GGUGGGGUGGGGAG<b>G</b>GGGGG-3'<br/>                                            <br/> 3' -CGACCCACCCCU<b>U</b><b>U</b>C<b>U</b>CC-5'</p>                                          | <p><i>HMGA2</i>; ID00849.3p-miR; 3'UTR; 1268; -117; 90; 22<br/> 5' -GGUGGG<b>G</b>AGGGGG<b>G</b>GGUGGGG-3'<br/>                                            <br/> 3' -CCACCC<b>U</b>CUCCCC<b>U</b>C<b>U</b>CCCC-5'</p>                                |
| <p><i>SMAD3</i>; miR-4507; 3'UTR; 2066; -106; 91; 20<br/> 5' -CCCAGCCAGCCCG<b>G</b>CCCCG-3'<br/>                                            <br/> 3' -GGGUCGGGUCGGGU<b>U</b>GGGUC-5'</p>                                                             | <p><i>SMAD3</i>; miR-937-5p; 3'UTR; 2072; -102; 89; 20<br/> 5' -CCAGCCCG<b>G</b>CCCCGCCCCG<b>C</b>-3'<br/>                                            <br/> 3' -GGUCGGGG<b>U</b>GGG<b>A</b>CUGAG<b>U</b>G-5'</p>                                     |
| <p><i>TGFB1</i>; miR-877-3p; 233; 5'UTR; -108; 93; 21<br/> 5' -CGGGGAGGAGGG<b>G</b>GAGGAGGA-3'<br/>                                            <br/> 3' -GACCCUCCUCC<b>U</b>C<b>U</b>CUCCU-5'</p>                                                    | <p><i>TGFB1</i>; miR-937-5p; 2089; 3'UTR; -102; 89; 20<br/> 5' -CC<b>G</b>GGCCCA<b>C</b>CCCGCCCC<b>G</b>C-3'<br/>                                            <br/> 3' -GG<b>U</b>CGGGGUGGG<b>A</b>CUGAG<b>U</b>G-5'</p>                              |
| <p><i>HMGA2</i>; ID01403.5p-miR; 5'UTR; 547; -119; 88; 23<br/> 5' -<b>C</b>ACCCACCGCC<b>G</b>CGCGCC<b>C</b>ACC-3'<br/>                                            <br/> 3' -G<b>C</b>G<b>A</b>GUGGCG<b>A</b>CG<b>A</b>CGGCGG<b>C</b>G<b>A</b>-5'</p> | <p><i>SMAD3</i>; ID01020.5p-miR; 5'UTR; 194; -117; 100; 19<br/> 5' -GCGACCGCGGCAGGCCCCG-3'<br/>                                            <br/> 3' -CGCUGGCGCCGUCCGGGGC-5'</p>                                                                      |
| <p><i>ANGPTL4</i>; ID01593.5p-miR; CDS; 259; -134; 100; 23<br/> 5' -AGCGCUCAGGGCGGACCCGUGCA-3'<br/>                                            <br/> 3' -UCGCGAGUCCCGCCUGGGCACGU-5'</p>                                                              | <p><i>FOXA1</i>; ID03332.3p-miR; CDS; 150; -134; 90; 24<br/> 5' -<b>A</b>GCGGA<b>A</b>GCGG<b>G</b>GGC<b>A</b>GCGGCGCC-3'<br/>                                            <br/> 3' -CCGCC<b>U</b>CCGCC<b>U</b>CCG<b>C</b>CGCCGCGG-5'</p>              |

Note: Gene; miRNA; the miRNA region; start of binding site (nt); the free energy,  $\Delta G$  (kJ/mole); the  $\Delta G/\Delta G_m$  (%); length of miRNA (nt). The upper and lower nucleotide sequences of mRNA and miRNA, respectively. The nucleotides of non-canonical pairs G-U and A-C highlighted in bold type.

**Supplemental Figure S2** Schemes of miRNA interaction with mRNA of candidate genes of breast cancer luminal A and B subtypes.
