# Supplementary material for: Prediction of clusters of miRNA binding sites in mRNA candidate genes of breast cancer subtypes
Source: PeerJ journal article supplement (doi:10.7717/peerj.8049), 2019-11-13
Supplement: Figure_S3.pdf [file Figure_S3.pdf]

|                                                                                                                                                                                                                                                                                                                                                  |                                                                                                                                                                                          |
|--------------------------------------------------------------------------------------------------------------------------------------------------------------------------------------------------------------------------------------------------------------------------------------------------------------------------------------------------|------------------------------------------------------------------------------------------------------------------------------------------------------------------------------------------|
| <p><i>MAZ</i>; ID02998.3p-miR; 5'UTR; 22; -113; 90; 21<br/> 5' -<b>GG</b>UGCGC<b>GG</b>GGCGG<b>CGGG</b>GGCGG-3'<br/>      <br/> 3' -<b>UC</b>ACGCG<b>UC</b>CGCC<b>UC</b>CCCGCC-5'</p>                                                                                                                                                            | <p><i>MAZ</i>; ID02979.5p-miR; 5'UTR; 114; -121; 92; 22<br/> 5' -CG<b>GG</b>CCC<b>GG</b>CGCCCC<b>GG</b>CCCCCG-3'<br/>      <br/> 3' -GC<b>UGG</b>AC<b>CG</b>GGGG<b>GC</b>GGGGGA-5'</p>   |
| <p><i>MAZ</i>; miR-5008-5p; 5'UTR; 133; -110; 88; 22<br/> 5' -CC<b>CG</b>UCAGCCCC<b>GG</b>GGGG<b>CCCG</b>-3'<br/>      <br/> 3' -GG<b>UG</b>ACACGGGG<b>U</b>UCC<b>CG</b>AG<b>U</b>-5'</p>                                                                                                                                                        | <p><i>NISCH</i>; ID01996.3p-miR; 5'UTR; 34; -110; 87; 21<br/> 5' -GGGG<b>GCACG</b>GGCGG<b>CGGGG</b>-3'<br/>      <br/> 3' -CCCC<b>UG</b>CCCC<b>UC</b>GCCCGCC<b>CU</b>-5'</p>             |
| <p><i>MAZ</i>; ID02499.3p-miR; CDS; 488; -115; 89; 21<br/> 5' -CCG<b>CG</b>CG<b>UC</b>GC<b>UC</b>CC<b>CG</b>CGCC<b>CC</b>-3'<br/>      <br/> 3' -GGCGGG<b>CGCC</b>GC<b>GGU</b>CGUGGG-5'</p>                                                                                                                                                      | <p><i>MAPK3</i>; miR-6805-3p; CDS; 1145; -117; 87; 23<br/> 5' -CUGGGGGC<b>AG</b>GGGAGCAG<b>GGGGG</b>-3'<br/>      <br/> 3' -GACCCCG<b>CC</b>CCCCUCGUC<b>UCGU</b>-5'</p>                  |
| <p><i>MAZ</i>; miR-3960; CDS; 506; -113; 90; 20<br/> 5' -CCCCG<b>CC</b>CC<b>UC</b>GCCCGCC<b>GC</b>-3'<br/>     <br/> 3' -GGGGCG<b>CA</b>GGCGGC<b>GGCG</b>-5'</p>                                                                                                                                                                                 | <p><i>CDK6</i>; ID00436.3p-miR; 3'UTR; 1896; -104; 89; 23<br/> 5' -GUGUGUG<b>UGG</b>CA<b>UG</b>UGUGUG<b>UG</b>-3'<br/>      <br/> 3' -CACACAC<b>CAUA</b>UA<b>UA</b>CACACA<b>U</b>-5'</p> |
| <p><i>MAZ</i>; miR-3960; CDS; 614; -117; 93; 20<br/> 5' -CCCCCGCC<b>UC</b>CGCC<b>CGCCACU</b>-3'<br/>      <br/> 3' -GGGGCGGAG<b>GC</b>GGCG<b>GGCGG</b>-5'</p>                                                                                                                                                                                    | <p><i>MAZ</i>; miR-6729-5p; CDS; 361; -115; 87; 22<br/> 5' -GCCCGCGCCGGCGCCC<b>CC</b>GCCCA-3'<br/>     <br/> 3' -CGGCGAGUCGGCGGG<b>AG</b>CGGGU-5'</p>                                    |
| <p><i>NISCH</i>; miR-877-3p; CDS; 2141; -102; 87; 21<br/> 5' -CC<b>AGGG</b>GGAGG<b>A</b>AGAGGAGGA-3'<br/>      <br/> 3' -G<b>AC</b>CC<b>UC</b>CCUCC<b>UCUUC</b>UCUU-5'</p>                                                                                                                                                                       | <p><i>MAZ</i>; miR-877-3p; 3'UTR; 2273; -106; 91; 21<br/> 5' -CC<b>AGGG</b>GGAGGGAGGAGAGGA-3'<br/>      <br/> 3' -G<b>AC</b>CC<b>UC</b>CCUCC<b>UCUUC</b>UCUU-5'</p>                      |
| <p><i>MAZ</i>; miR-7111-3p; 3'UTR; 2273; -106; 88; 22<br/> 5' -CC<b>AGGG</b>GGAGGGAGGAGAGGAA-3'<br/>      <br/> 3' -G<b>AC</b>CC<b>UC</b>CCUCC<b>UCUUC</b>CUA-5'</p>                                                                                                                                                                             | <p><i>MAZ</i>; ID01352.3p-miR; 3'UTR; 2274; -110; 87; 23<br/> 5' -C<b>AGGG</b>GG<b>AGG</b>GAGGAG<b>AG</b>GAAGG-3'<br/>      <br/> 3' -<b>A</b>UCCC<b>UC</b>CCUCC<b>UCUUC</b>CUUCC-5'</p> |
| <p>Note: Gene; miRNA; the miRNA region; start of binding site (nt); the free energy, <math>\Delta G</math> (kJ/mole); the <math>\Delta G/\Delta G_m</math> (%); length of miRNA (nt). The upper and lower nucleotide sequences of mRNA and miRNA, respectively. The nucleotides of non-canonical pairs G-U and A-C highlighted in bold type.</p> |                                                                                                                                                                                          |

**Supplemental Figure S3** Schemes of miRNA interaction with mRNA of candidate genes of breast cancer HER2 subtype.
