# Supplementary material for: Prediction of clusters of miRNA binding sites in mRNA candidate genes of breast cancer subtypes
Source: PeerJ journal article supplement (doi:10.7717/peerj.8049), 2019-11-13
Supplement: Supplemental_Table_S1.pdf [file Supplemental_Table_S1.pdf]

**Supplemental Table S1** Candidate genes of subtypes of breast cancer, indicating sources of information on their participation in oncogenesis of breast cancer.

| Gene (ID)                            | A source of information | Gene (ID)                  | A source of information |
|--------------------------------------|-------------------------|----------------------------|-------------------------|
| Subtype triple-negative (basal-like) |                         | Subtype HER2               |                         |
| <i>ATM</i> (ID: 472)                 | PMID: 29063517          | <i>ADAM17</i> (ID: 6868)   | PMID: 21501859          |
| <i>AXL</i> (ID: 558)                 | PMID: 29097911          | <i>AURKA</i> (ID: 6790)    | PMID: 29214214          |
| <i>BIRC5</i> (ID: 332)               | PMID: 22713668          | <i>BRCA2</i> (ID: 675)     | PMID: 27195161          |
| <i>CBL</i> (ID: 867)                 | PMID: 23784775          | <i>BRIP1</i> (ID: 83990)   | PMID: 26824983          |
| <i>CD44</i> (ID: 960)                | PMID: 29301020          | <i>CDK6</i> (ID: 1021)     | PMID: 29263697          |
| <i>CEACAM5</i> (ID: 1048)            | PMID: 28457854          | <i>EPOR</i> (ID: 2057)     | PMID: 23117856          |
| <i>ERBB3</i> (ID: 2065)              | PMID: 27845906          | <i>ERBB3</i> (ID: 2065)    | PMID: 29262628          |
| <i>F2RL1</i> (ID: 2150)              | PMID: 29195005          | <i>H2AFX</i> (ID: 3014)    | PMID: 25252808          |
| <i>FGFR2</i> (ID: 2263)              | PMID: 27220763          | <i>MAPK3</i> (ID: 5595)    | PMID: 28579432          |
| <i>FIS1</i> (ID: 51024)              | PMID: 24355041          | <i>MAZ</i> (ID: 4150)      | PMID: 22102859          |
| <i>IAPP</i> (ID: 3375)               | PMID: 29108265          | <i>NISCH</i> (ID: 11188)   | PMID: 28363452          |
| <i>IL11</i> (ID: 3589)               | PMID: 22629385          | <i>TIMP3</i> (ID: 7078)    | PMID: 22520950          |
| <i>JHDM1D</i> (ID: 80853)            | PMID: 22573479          | Subtypes luminal A and B   |                         |
| <i>LAMC1</i> (ID: 3915)              | PMID: 22578566          | <i>ANGPTL4</i> (ID: 51129) | PMID: 23354167          |
| <i>LASP1</i> (ID: 3927)              | PMID: 22713668          | <i>EZH1</i> (ID: 2145)     | PMID: 22685420          |
| <i>MAGEA10</i> (ID: 4109)            | PMID: 24560456          | <i>FOXA1</i> (ID: 3169)    | PMID: 28884749          |
| <i>MID1</i> (ID: 4281)               | PMID: 23623609          | <i>GTF2IRD1</i> (ID: 9569) | PMID: 20348243          |
| <i>MMP2</i> (ID: 4313)               | PMID: 27340107          | <i>HMGA2</i> (ID: 8091)    | PMID: 22685420          |
| <i>PFN1</i> (ID: 5216)               | PMID: 28699810          | <i>ITGB1</i> (ID: 3688)    | PMID: 27624535          |
| <i>PRKCE</i> (ID: 5581)              | PMID: 23542175          | <i>MAPT</i> (ID: 4137)     | PMID: 23262785          |
| <i>PRRT2</i> (ID: 112476)            | PMID: 29195005          | <i>MCM7</i> (ID: 4176)     | PMID: 22685420          |
| <i>RUNX1</i> (ID: 861)               | PMID: 27428424          | <i>SMAD3</i> (ID: 4088)    | PMID: 24235142          |
| <i>SERPINE1</i> (ID: 5054)           | PMID: 23721519          | <i>SOX4</i> (ID: 6659)     | PMID: 22685420          |
| <i>SFN</i> (ID: 2810)                | PMID: 24067649          | <i>TGFB1</i> (ID: 7040)    | PMID: 23354167          |
| <i>STMN1</i> (ID: 3925)              | PMID: 28766688          |                            |                         |
