# Supplementary material for: Prediction of clusters of miRNA binding sites in mRNA candidate genes of breast cancer subtypes
Source: PeerJ journal article supplement (doi:10.7717/peerj.8049), 2019-11-13
Supplement: Supplemental_Table_S2.pdf [file Supplemental_Table_S2.pdf]

**Supplemental Table S2 Information on miRNAs interacted with genes of breast cancer and other cancer.**

| miRNA                      | Information about miRNAs                   | A source of information        |
|----------------------------|--------------------------------------------|--------------------------------|
| TJU_CMC_MD2.ID03306.3p-miR | MDA-MB-231 cells (BC)                      | PMID: 26400174                 |
| miR-127-3p                 | Exosomes (BC)                              | PMID: 30309355                 |
| miR-466                    | Prostate cancer cells                      | PMID: 28125091                 |
| miR-548aq-3p               | Intrahepatic cholangiocarcinoma cells      | PMID: 27619971                 |
| miR-548z                   | Hepatoblastoma cells                       | PMID: 29404451                 |
| miR-566                    | Glioma cell lines, melanoma cells          | PMID: 24650032, PMID: 30323971 |
| miR-574-3p                 | Melanoma cells, serum (Pancreatic cancer)  | PMID: 20302635, PMID: 25664025 |
| miR-574-5p                 | BC cells                                   | PMID: 28789418                 |
| miR-619-5p                 | Colorectal carcinoma cells                 | PMID: 28101234                 |
| miR-762                    | Serum (Pancreatic cancer)                  | PMID: 25664025                 |
| miR-877-3p                 | Bladder cancer cells                       | PMID: 27429046                 |
| miR-937-5p                 | BC cells                                   | PMID: 26378051                 |
| miR-1273c                  | BC cells                                   | PMID: 25471792                 |
| miR-1273d                  | Glioma cells                               | PMID: 26892862                 |
| miR-1273e                  | Urinary exosomes                           | PMID: 29479137                 |
| miR-1273f                  | Plasma (hepatocellular carcinoma)          | PMID: 28657540                 |
| miR-1273-3p                | Colon cancer cells                         | PMID: 30186855                 |
| miR-1273g-3p               | Serum (ovarian cancer)                     | PMID: 30264202                 |
| miR-1285-3p                | Plasma (hepatocellular carcinoma)          | PMID: 25230788                 |
| miR-1470                   | Serum (esophageal squamous cell carcinoma) | PMID: 29344220                 |
| miR-1908-3p                | Mutant UQCRB-expressing cells (cancer)     | PMID: 30120311                 |
| miR-2861                   | Cervical cancer tissues                    | PMID: 27364926, PMID: 26656154 |
| miR-3155a                  | Prostate, bladder cancer cells             | PMID: 29291244                 |
| miR-3198                   | Stem cell, serum (pancreatic cancer)       | PMID: 30389909, PMID: 25664025 |
| miR-3620-5p                | Glioma-associated human mesenchymal cells  | PMID: 28855213                 |
| miR-3960                   | BC cells                                   | PMID: 28886127                 |
| miR-4466                   | BC cells                                   | PMID: 28789418                 |
| miR-4507-3p                | BC cells                                   | PMID: 26397135                 |
| miR-4508                   | BC cells                                   | PMID: 27019627                 |
| miR-4690-5p                | Exosomes (hyperhomocysteinemia)            | PMID: 29560091                 |
| miR-4706                   | Melanoma cells                             | PMID: 26778792                 |
| miR-4787-5p                | Pancreatic cancer cells                    | PMID: 27624777                 |
| miR-5008-5p                | Gastric cancer                             | PMID: 30373600                 |
| miR-5095                   | Cholangiocarcinoma cells                   | PMID: 29620172                 |
| miR-5096                   | Glioma cells                               | PMID: 25978028                 |
| miR-5585-3p                | BC cells                                   | PMID: 28789418                 |

|             |                               |                |
|-------------|-------------------------------|----------------|
| miR-6089    | Colorectal cancer cells       | PMID: 27780077 |
| miR-6729-5p | Exosomes (aging)              | PMID: 26370963 |
| miR-6756-5p | BC cells                      | PMID: 29607263 |
| miR-6805-3p | Oral mucosal melanoma cells   | PMID: 30323971 |
| miR-6805-5p | Oral mucosal melanoma cells   | PMID: 30323971 |
| miR-6846-5p | Oral mucosal melanoma cells   | PMID: 30323971 |
| miR-6850-5p | Excretory system cancer cells | PMID: 27019673 |
| miR-7111-3p | Exosomes (aging)              | PMID: 26370963 |
