# Supplementary material for: Prediction of clusters of miRNA binding sites in mRNA candidate genes of breast cancer subtypes
Source: PeerJ journal article supplement (doi:10.7717/peerj.8049), 2019-11-13
Supplement: Supplemental_Table_S3.pdf [file Supplemental_Table_S3.pdf]

**Supplemental Table S3 The nucleotide sequence of clusters of miRNA binding sites in orthologous candidate genes of triple-negative subtype.**

| Gene            | Nucleotide sequences of cluster                                                                                                                                                                                                                                                                                         | Species                                |
|-----------------|-------------------------------------------------------------------------------------------------------------------------------------------------------------------------------------------------------------------------------------------------------------------------------------------------------------------------|----------------------------------------|
| <i>CBL</i>      | ggcggcgggcgggcgggcgggcgggcgggcgggcgggcggggag<br>gcccggauagccggcgggcgggcgggcgggcgggcgggcggggag<br>gcccggauagccggcgggcgggcgggcgggcgggcgggcggggag<br>gcccggauagccggcgggcgggcgggcgggcgggcggggag                                                                                                                             | Hsa<br>Ptr<br>Ggo<br>Pan               |
| <i>CBL</i> **   | gagauggagucucgcugugucgccaggcuggag<br>gagacggagucucgcugugucgccaggcuggag<br>gagacagagucucgcugugucgccaggcuggag<br>gagacagagucucgcugugucgccaggcuggag<br>gagaaggagucucgcugugucaccuaggcuggag                                                                                                                                  | Hsa<br>Ggo<br>Ptr<br>Ppa<br>Pan        |
| <i>MMP2</i>     | gcggcgggcgggcgggcgggcgggcgggcgggcgggcgggg<br>gcggcgggcgggcgggcgggcgggcgggcgggcgggcgggg<br>gcggcgggcgggcgggcgggcgggcgggcgggcgggcgggg<br>gcggcgggcgggcgggcgggcgggcgggcgggcgggcgggg<br>gcggcgggcgggcgggcgggcgggcgggcgggcgggcgggg<br>gcggcgggcgggcgggcgggcgggcgggcgggcgggcgggg<br>gcggcgggcgggcgggcgggcgggcgggcgggcgggcgggg | Hsa<br>Pab<br>Ggo<br>Ptr<br>Mml<br>Pan |
| <i>RAB5A</i>    | ggcggcgggagggagaaaggaaaggagaa<br>ggcggcgggagggagaaaggaaaggagaa<br>ugcggcgggaggggaaaggaaaggagaa<br>ggcggcgggagggagaaaggaaaggagaa<br>ucuggagggagggagaaaggaaaggcgaa                                                                                                                                                        | Hsa<br>Ptr<br>Mml<br>Pab<br>Mmu        |
| <i>RAB5A</i>    | gccaccaccaccgccaugauacacuc<br>gccaccaccaccgccaugauacacuc<br>gccaccaccaccgccaugauacacuc<br>gccaccaccaccgccaugacacacac                                                                                                                                                                                                    | Hsa<br>Ptr<br>Pab<br>Mml               |
| <i>ATM</i> **   | cgggcuggggcgagcggcucacgccuguaauccagc<br>ugggcuggggcgagcagcucacgccuguaauccagc<br>cgggcuggggcgagcggcucacgccuguaauccagc<br>cgggcugggauacagcagcucacgccuguaauccggc<br>cgggcuggggcgagcggcucacgccuguaauccagc                                                                                                                   | Hsa<br>Pab<br>Ptr<br>Pan<br>Ppa        |
| <i>ATM</i> **   | uaaugagacagagucucugucacccaggcuggagucaguggc<br>uaaugagacagagucucugucacccaggcuggagucaguggc<br>aguagagacagaguucaccguguuagccaggauaggucgaucgcu<br>aguagagacagaguucaccguguuagccaggauaggucgaucgcu<br>aguagagacagaguucaccguguuagccaggauaggucuccaucgcc                                                                           | Hsa<br>Ptr<br>Ppa<br>Pan<br>Pab        |
| <i>IL11</i> **  | cacugcaaccuccaccucccgguucaagcaa<br>cacugcaaccuccaccucccgguucaagcaa<br>cacugcaaccuccaccucccgguucaagcaa                                                                                                                                                                                                                   | Hsa<br>Ptr<br>Ppa                      |
| <i>RUNX1</i> ** | guaugugugugugugugugugugugugugugugugugugug<br>gugugugugugugugugugugugugugugugugugugugugug<br>gugugugugugugugugugugugugugugugugugugugugug<br>uuugugugugugugugugugugugugugugugugugugugagag                                                                                                                                 | Hsa<br>Ptr<br>Mml<br>Pan               |
| <i>SFN</i> **   | ccgccaccgccccgccugccccuccagucccc<br>ccgccaccgccccgccugccccuccagucccc<br>ccgccaccgccccgccugccccuccagucccc<br>ccgccaccgccccgccugccccuccagucccc                                                                                                                                                                            | Ptr<br>Hsa<br>Ggo<br>Ppa               |
| <i>SFN</i> **   | gcuggagaugggugugugugugugugugugugugugugugugugug<br>gcuggagaugggugugugugugugugugugugugugugugugugugacag<br>gcuggagaugggugugugugugugugugugugugugugugugugugug<br>gagggagugugugugugugugugugugugugugugugugugugugug                                                                                                             | Hsa<br>Ptr<br>Ppa                      |
| <i>STMN1</i> ** | gaggcagagucucacucugucgccaggcuggagggcagugg<br>gaggcagagucucacucugucgccaggcuggagggcagugg                                                                                                                                                                                                                                  | Hsa<br>Ppa                             |

Note. In Tables S3, S4 and S5 shown: Genes without \* - miRNA binding sites are in the 5'UTR, genes with \* - miRNA binding sites are in the CDS, \*\* - miRNA binding sites are in the 3'UTR.
