# Supplementary material for: Prediction of clusters of miRNA binding sites in mRNA candidate genes of breast cancer subtypes
Source: PeerJ. 2019 Nov 13;7:e8049. doi: 10.7717/peerj.8049 (PMC6858813; doi:10.7717/peerj.8049)
Supplement: Table S4 [file peerj-07-8049-s007.pdf]

**Supplemental Table S4** The nucleotide sequence of clusters of miRNA binding sites in orthologous candidate genes of luminal A and B subtypes.

[illegible]
