# Supplementary material for: Prediction of clusters of miRNA binding sites in mRNA candidate genes of breast cancer subtypes
Source: PeerJ. 2019 Nov 13;7:e8049. doi: 10.7717/peerj.8049 (PMC6858813; doi:10.7717/peerj.8049)
Supplement: Table S5 [file peerj-07-8049-s008.pdf]

**Supplemental Table S5** The nucleotide sequence of clusters of miRNA binding sites in orthologous candidate genes of HER2 subtype.

| Gene           | Nucleotide sequence of cluster                                                                                                                                                                                               | Species                                                                                        |
|----------------|------------------------------------------------------------------------------------------------------------------------------------------------------------------------------------------------------------------------------|------------------------------------------------------------------------------------------------|
| <i>EPOR</i>    | gcccgggggacgggggacgaggggacg<br>gccaggggacgggggacgaggggacg<br>gccaggggacgggggacgaggggacg<br>gccaggggacgggggacgaggggacg<br>gccaggggacgggggacgaggggacg<br>gccaggggacgggggacgaggggacg<br>gccaggggacgggggacgaggggacg              | <i>Hsa</i><br><i>Ptr</i><br><i>Mml</i><br><i>Ggo</i><br><i>Pan</i><br><i>Ppa</i><br><i>Pab</i> |
| <i>MAZ</i>     | ggccggggugcgcgggacgggggacgg<br>ggccggggugcgcgggacgggggacgg<br>ggccggggugcgcgggacgggggacgg                                                                                                                                    | <i>Hsa</i><br><i>Ptr</i><br><i>Pab</i>                                                         |
| <i>MAZ</i>     | cgcggggagcggggggcggggcggggc<br>cgcggggagcggggggcggggcggggc<br>cgcggggagcggggggcggggcggggc                                                                                                                                    | <i>Hsa</i><br><i>Ptr</i><br><i>Pab</i>                                                         |
| <i>MAZ*</i>    | gcccgcgcggcggggggcggggcggggc<br>gcccgcgcggcggggggcggggcggggc<br>gcccgcgcggcggggggcggggcggggc                                                                                                                                 | <i>Hsa</i><br><i>Ptr</i><br><i>Pab</i>                                                         |
| <i>MAZ*</i>    | gcccgcgcggcggggggcggggcggggc<br>gcccgcgcggcggggggcggggcggggc<br>gcccgcgcggcggggggcggggcggggc                                                                                                                                 | <i>Hsa</i><br><i>Ptr</i><br><i>Pab</i>                                                         |
| <i>MAZ*</i>    | aggccgcgcggggggcggggcggggc<br>aggccgcgcggggggcggggcggggc<br>aggccgcgcggggggcggggcggggc                                                                                                                                       | <i>Hsa</i><br><i>Ptr</i><br><i>Pab</i>                                                         |
| <i>MAZ*</i>    | gcccgcgcggcggggggcggggcggggc<br>gcccgcgcggcggggggcggggcggggc<br>gcccgcgcggcggggggcggggcggggc                                                                                                                                 | <i>Hsa</i><br><i>Ptr</i><br><i>Pab</i>                                                         |
| <i>NISCH</i>   | ggcgggggacgggggacgggggacgggg<br>ggcgggggacgggggacgggggacgggg<br>ggcgggggacgggggacgggggacgggg<br>ggcgggggacgggggacgggggacgggg<br>ggcgggggacgggggacgggggacgggg<br>ggcgggggacgggggacgggggacgggg<br>ggcgggggacgggggacgggggacgggg | <i>Hsa</i><br><i>Ptr</i><br><i>Pab</i><br><i>Ggo</i><br><i>Pan</i><br><i>Ppa</i>               |
| <i>MAPK3*</i>  | ccaauaaacggauacaguggagg<br>ccaauaaacggauacaguggagg<br>ccaauaaacggauacaguggagg<br>ccaauaaacggauacaguggagg                                                                                                                     | <i>Hsa</i><br><i>Ptr</i><br><i>Ggo</i><br><i>Pab</i>                                           |
| <i>BRCA2**</i> | aaaacaucuuuggcugagcucgguggc<br>aaaacaucuuuggcugagcucgguggc<br>aaaacaucuuuggcugagcucgguggc<br>aaaacaucuuuggcugagcucgguggc                                                                                                     | <i>Hsa</i><br><i>Ppa</i><br><i>Ggo</i><br><i>Pab</i>                                           |
| <i>CDK6**</i>  | ugcaagagugauugcagcuuuauugu<br>ugcaagagugauugcagcuuuauugu<br>ugcaagagugauugcagcuuuauugu<br>ugcaagagugauugcagcuuuauugu                                                                                                         | <i>Hsa</i><br><i>Ptr</i><br><i>Pab</i><br><i>Ppa</i>                                           |
| <i>CDK6**</i>  | ugugugugugcagugugugugugugug<br>ugugugugugcagugugugugugugug<br>ugugugugugcagugugugugugugug<br>ugugugugugcagugugugugugugug                                                                                                     | <i>Hsa</i><br><i>Ptr</i>                                                                       |
